# Supplementary material for: Effectiveness of Pharmacological Intervention Among Men with Infertility: A Systematic Review and Network Meta-Analysis
Source: PubMed Central journal article supplement (PMC8415454; doi:10.3389/fphar.2021.638628), 2021-08-16
Supplement: DataSheet1.pdf [file DataSheet1.pdf]

## **Effectiveness of Pharmacological Intervention among Men with Infertility: A systematic review and network meta-analysis**

**Mr. Muhammad Nabeel Shahid\* (Corresponding author and first author)**

Affiliations:

1. Department of Pharmacy Practice, Faculty of Pharmacy, Universiti Teknologi MARA Cawangan Selangor, Puncak Alam Campus, Selangor Malaysia
2. Department of Pharmacy Practice, Institute of Pharmaceutical Sciences, University of Veterinary and Animal Sciences, 54000, Lahore, Punjab, Pakistan.

Email address:

nabeelshahidk@hotmail.com

**Dr. Tahir Mehmood Khan\* (Co-corresponding author and Author)**

Affiliations:

1. Department of Pharmacy Practice, Institute of Pharmaceutical Sciences, University of Veterinary and Animal Sciences, 54000, Lahore, Punjab, Pakistan.
2. School of Pharmacy, Monash University, Jalan Lagoon Selatan 45700, Selangor, Malaysia.

Email address:

tahir.khan@uvas.edu.pk

**Dr. Chin Fen Neoh (Author)**

Affiliations:

1. Department of Pharmacy Practice, Faculty of Pharmacy, Universiti Teknologi MARA Cawangan Selangor, Puncak Alam Campus, Selangor Malaysia.

Email address:

chinfenneoh@gmail.com

**Dr. Qi Ying Lean (Author)**

Affiliations:

1. Faculty of Pharmacy, Universiti Teknologi MARA, Cawangan Pulau Pinang, Kampus Bertam, Pulau Pinang, Malaysia.

2. Vector-Borne Diseases Research Group (VERDI), Pharmaceutical and Life Sciences CoRe, Universiti Teknologi MARA, Shah Alam, Selangor, Malaysia.

Email address:

leanqiyiing@yahoo.com

**Dr. Allah Bukhsh (Author)**

Affiliations:

1. Department of Pharmacy Practice, Institute of Pharmaceutical Sciences, University of Veterinary and Animal Sciences, 54000, Lahore, Pakistan.

2. School of Pharmacy, Monash University, Jalan Lagoon Selatan 45700, Selangor, Malaysia.

Email address:

abukhsh@uvas.edu.pk

**Dr. Mahmathi Karuppanan (Author)**

Affiliations:

1. Department of Pharmacy Practice, Faculty of Pharmacy, Universiti Teknologi MARA Cawangan Selangor, Puncak Alam Campus, Selangor Malaysia.

Email address:

mahmathi@uitm.edu.my

Supplementary material: Contents

Appendix 1 Search strategy

**APPENDIX I: SEARCH STRATEGY**

**Search Term**

| Search Items                                                                                                                                                                                                                                            |        | Search Engines |        |                  |        |           |              |                |
|---------------------------------------------------------------------------------------------------------------------------------------------------------------------------------------------------------------------------------------------------------|--------|----------------|--------|------------------|--------|-----------|--------------|----------------|
|                                                                                                                                                                                                                                                         |        | PubMed         | Scopus | Cochrane Library | Embase | EBSCOhost | Ovid Medline | Google Scholar |
| ("infertility"[MeSH Terms] OR "infertility"[All Fields]) AND ("oligospermia"[MeSH Terms] OR "oligospermia"[All Fields]) AND "humans"[MeSH Terms]                                                                                                        | Result | 5535           | 8200   | 207              | 4733   | 3049      | 4777         | 15             |
|                                                                                                                                                                                                                                                         | Chosen | 5499           | 4786   | 69               | 1810   | 403       | 4301         | 11             |
| ("infertility"[MeSH Terms] OR "infertility"[All Fields]) AND ("azoospermia"[MeSH Terms] OR "azoospermia"[All Fields] OR "azospermia"[All Fields]) AND "humans"[MeSH Terms]                                                                              | Result | 4709           | 352    | 18               | 6523   | 3705      | 8351         | 80             |
|                                                                                                                                                                                                                                                         | Chosen | 2352           | 173    | 14               | 2212   | 641       | 4375         | 25             |
| ("infertility"[MeSH Terms] OR "infertility"[All Fields]) AND ("oligospermia"[MeSH Terms] OR "oligozoospermia"[All Fields]) AND "humans"[MeSH Terms]                                                                                                     | Result | 5992           | 5288   | 61               | 1494   | 1137      | 2672         | 15             |
|                                                                                                                                                                                                                                                         | Chosen | 236            | 2316   | 10               | 115    | 51        | 424          | 10             |
| ("infertility"[MeSH Terms] OR "infertility"[All Fields]) AND ("oligospermia"[MeSH Terms] OR "oligoasthenoteratozoospermia"[All Fields]) AND "humans"[MeSH Terms]                                                                                        | Result | 5677           | 1241   | 38               | 434    | 271       | 707          | 6              |
|                                                                                                                                                                                                                                                         | Chosen | 99             | 108    | 14               | 82     | 20        | 206          | 4              |
| ("infertility"[MeSH Terms] OR "infertility"[All Fields]) AND ("genitalia"[MeSH Terms] OR "genitalia"[All Fields] OR "genital"[All Fields]) AND ("disease"[MeSH Terms] OR "disease"[All Fields]) AND "humans"[MeSH Terms]                                | Result | 3312           | 20352  | 108              | 22     | 1631      | 74           | 2              |
|                                                                                                                                                                                                                                                         | Chosen | 2859           | 16408  | 59               | 7      | 383       | 44           | 1              |
| ("infertility"[MeSH Terms] OR "infertility"[All Fields]) AND ("semen"[MeSH Terms] OR "semen"[All Fields]) AND "humans"[MeSH Terms]                                                                                                                      | Result | 10225          | 41244  | 876              | 13428  | 11509     | 21294        | 373            |
|                                                                                                                                                                                                                                                         | Chosen | 7123           | 22701  | 322              | 4288   | 1307      | 12591        | 257            |
| ("infertility"[MeSH Terms] OR "infertility"[All Fields]) AND ("oligospermia"[MeSH Terms] OR "oligospermia"[All Fields] OR "low"[All Fields] AND "sperm"[All Fields] AND "count"[All Fields]) OR "low sperm count"[All Fields]) AND "humans"[MeSH Terms] | Result | 6036           | 7319   | 79               | 143    | 239       | 483          | 3              |
|                                                                                                                                                                                                                                                         | Chosen | 161            | 4161   | 20               | 33     | 1         | 181          | 2              |
| ("infertility"[MeSH Terms] OR "infertility"[All Fields] OR "subfertility"[All Fields]) AND ("oligospermia"[MeSH Terms] OR "oligospermia"[All Fields]) AND "humans"[MeSH Terms]                                                                          | Result | 5521           | 1224   | 29               | 318    | 135       | 402          | 0              |
|                                                                                                                                                                                                                                                         | Chosen | 0              | 26     | 2                | 28     | 1         | 23           | 0              |
| ("infertility"[MeSH Terms] OR "infertility"[All Fields] OR "subfertility"[All Fields]) AND ("azoospermia"[MeSH Terms] OR "azoospermia"[All Fields]) AND "humans"[MeSH Terms]                                                                            | Result | 4692           | 9      | 0                | 290    | 86        | 694          | 1              |
|                                                                                                                                                                                                                                                         | Chosen | 23             | 0      | 0                | 29     | 0         | 16           | 1              |
| ("infertility"[MeSH Terms] OR "infertility"[All Fields] OR "subfertility"[All Fields]) AND ("oligospermia"[MeSH Terms] OR "oligospermia"[All Fields] OR "oligozoospermia"[All Fields]) AND "humans"[MeSH Terms]                                         | Result | 5993           | 1119   | 29               | 93     | 52        | 333          | 3              |
|                                                                                                                                                                                                                                                         | Chosen | 1              | 7      | 0                | 4      | 3         | 2            | 2              |
| ("infertility"[MeSH Terms] OR "infertility"[All Fields] OR "subfertility"[All Fields]) AND ("oligospermia"[MeSH Terms] OR "oligospermia"[All Fields] OR "oligoasthenoteratozoospermia"[All Fields]) AND "humans"[MeSH Terms]                            | Result | 5677           | 317    | 1                | 30     | 17        | 95           | 0              |
|                                                                                                                                                                                                                                                         | Chosen | 0              | 2      | 0                | 4      | 0         | 0            | 0              |

|                                                                                                                                                                                                                                                               |        |       |      |     |      |     |      |    |
|---------------------------------------------------------------------------------------------------------------------------------------------------------------------------------------------------------------------------------------------------------------|--------|-------|------|-----|------|-----|------|----|
| ("infertility"[MeSH Terms] OR "infertility"[All Fields] OR "subfertility"[All Fields]) AND (("genitalia"[MeSH Terms] OR "genitalia"[All Fields] OR "genital"[All Fields]) AND ("disease"[MeSH Terms] OR "disease"[All Fields]))                               | Result | 4162  | 1942 | 15  | 2    | 38  | 10   | 0  |
|                                                                                                                                                                                                                                                               | Chosen | 780   | 273  | 2   | 1    | 3   | 1    | 0  |
| ("infertility"[MeSH Terms] OR "infertility"[All Fields] OR "subfertility"[All Fields]) AND ("semen"[MeSH Terms] OR "semen"[All Fields])                                                                                                                       | Result | 11781 | 6031 | 119 | 1110 | 508 | 2163 | 12 |
|                                                                                                                                                                                                                                                               | Chosen | 1552  | 463  | 19  | 199  | 17  | 218  | 9  |
| ("infertility"[MeSH Terms] OR "infertility"[All Fields] OR "subfertility"[All Fields]) AND ("oligospermia"[MeSH Terms] OR "oligospermia"[All Fields] OR ("low"[All Fields] AND "sperm"[All Fields] AND "count"[All Fields]) OR "low sperm count"[All Fields]) | Result | 6508  | 1465 | 16  | 9    | 5   | 76   | 0  |
|                                                                                                                                                                                                                                                               | Chosen | 321   | 76   | 3   | 3    | 0   | 0    | 0  |
| Subfertile[All Fields] AND ("oligospermia"[MeSH Terms] OR "oligospermia"[All Fields])                                                                                                                                                                         | Result | 167   | 1449 | 29  | 242  | 169 | 377  | 0  |
|                                                                                                                                                                                                                                                               | Chosen |       | 49   | 0   | 20   | 4   | 59   | 0  |
| Subfertile[All Fields] AND ("azoospermia"[MeSH Terms] OR "azoospermia"[All Fields] OR "azospermia"[All Fields])                                                                                                                                               | Result | 107   | 90   | 0   | 197  | 112 | 653  | 0  |
|                                                                                                                                                                                                                                                               | Chosen | 10    | 0    | 0   | 19   | 1   | 57   | 0  |
| Subfertile[All Fields] AND ("oligospermia"[MeSH Terms] OR "oligospermia"[All Fields] OR "oligozoospermia"[All Fields])                                                                                                                                        | Result | 189   | 1364 | 11  | 85   | 67  | 345  | 0  |
|                                                                                                                                                                                                                                                               | Chosen | 1     | 23   | 0   | 4    | 0   | 10   | 0  |
| Subfertile[All Fields] AND ("oligospermia"[MeSH Terms] OR "oligospermia"[All Fields] OR "oligoasthenoteratozoospermia"[All Fields])                                                                                                                           | Result | 177   | 302  | 1   | 21   | 16  | 106  | 3  |
|                                                                                                                                                                                                                                                               | Chosen | 0     | 2    | 0   | 3    | 0   | 3    | 2  |
| Subfertile[All Fields] AND (("genitalia"[MeSH Terms] OR "genitalia"[All Fields] OR "genital"[All Fields]) AND ("disease"[MeSH Terms] OR "disease"[All Fields]))                                                                                               | Result | 65    | 1690 | 15  | 0    | 27  | 6    | 0  |
|                                                                                                                                                                                                                                                               | Chosen | 7     | 268  | 0   | 0    | 0   | 1    | 0  |
| Subfertile[All Fields] AND ("semen"[MeSH Terms] OR "semen"[All Fields])                                                                                                                                                                                       | Result | 747   | 6861 | 119 | 5078 | 781 | 2229 | 82 |
|                                                                                                                                                                                                                                                               | Chosen | 131   | 872  | 1   | 120  | 28  | 346  | 60 |
| Subfertile[All Fields] AND ("oligospermia"[MeSH Terms] OR "oligospermia"[All Fields] OR ("low"[All Fields] AND "sperm"[All Fields] AND "count"[All Fields]) OR "low sperm count"[All Fields])                                                                 | Result | 224   | 1339 | 17  | 11   | 16  | 76   | 0  |
|                                                                                                                                                                                                                                                               | Chosen | 0     | 78   | 0   | 0    | 1   | 2    | 0  |

**Supplementary Table 1: Reasons for study exclusion after full-text assessment (n=607)**

| <b>Database</b>                                                                               | <b>Number of records</b> |
|-----------------------------------------------------------------------------------------------|--------------------------|
| Review articles                                                                               | <b>203</b>               |
| Irrelevant articles (conference papers/proceedings, letter to the editor and study protocols) | <b>194</b>               |
| Meta-Analysis                                                                                 | <b>19</b>                |
| Surgical intervention articles                                                                | <b>30</b>                |
| Systematic reviews                                                                            | <b>44</b>                |
| Does not meet selection criteria (details are as under)-                                      | <b>75</b>                |
| <i>Not measured male patient data</i>                                                         | <i>37</i>                |
| <i>Not measured the selected outcomes</i>                                                     | <i>51</i>                |

**Supplementary Figure 1:** Overall meta-analysis for sperm concentration of included RCTs (n=29)

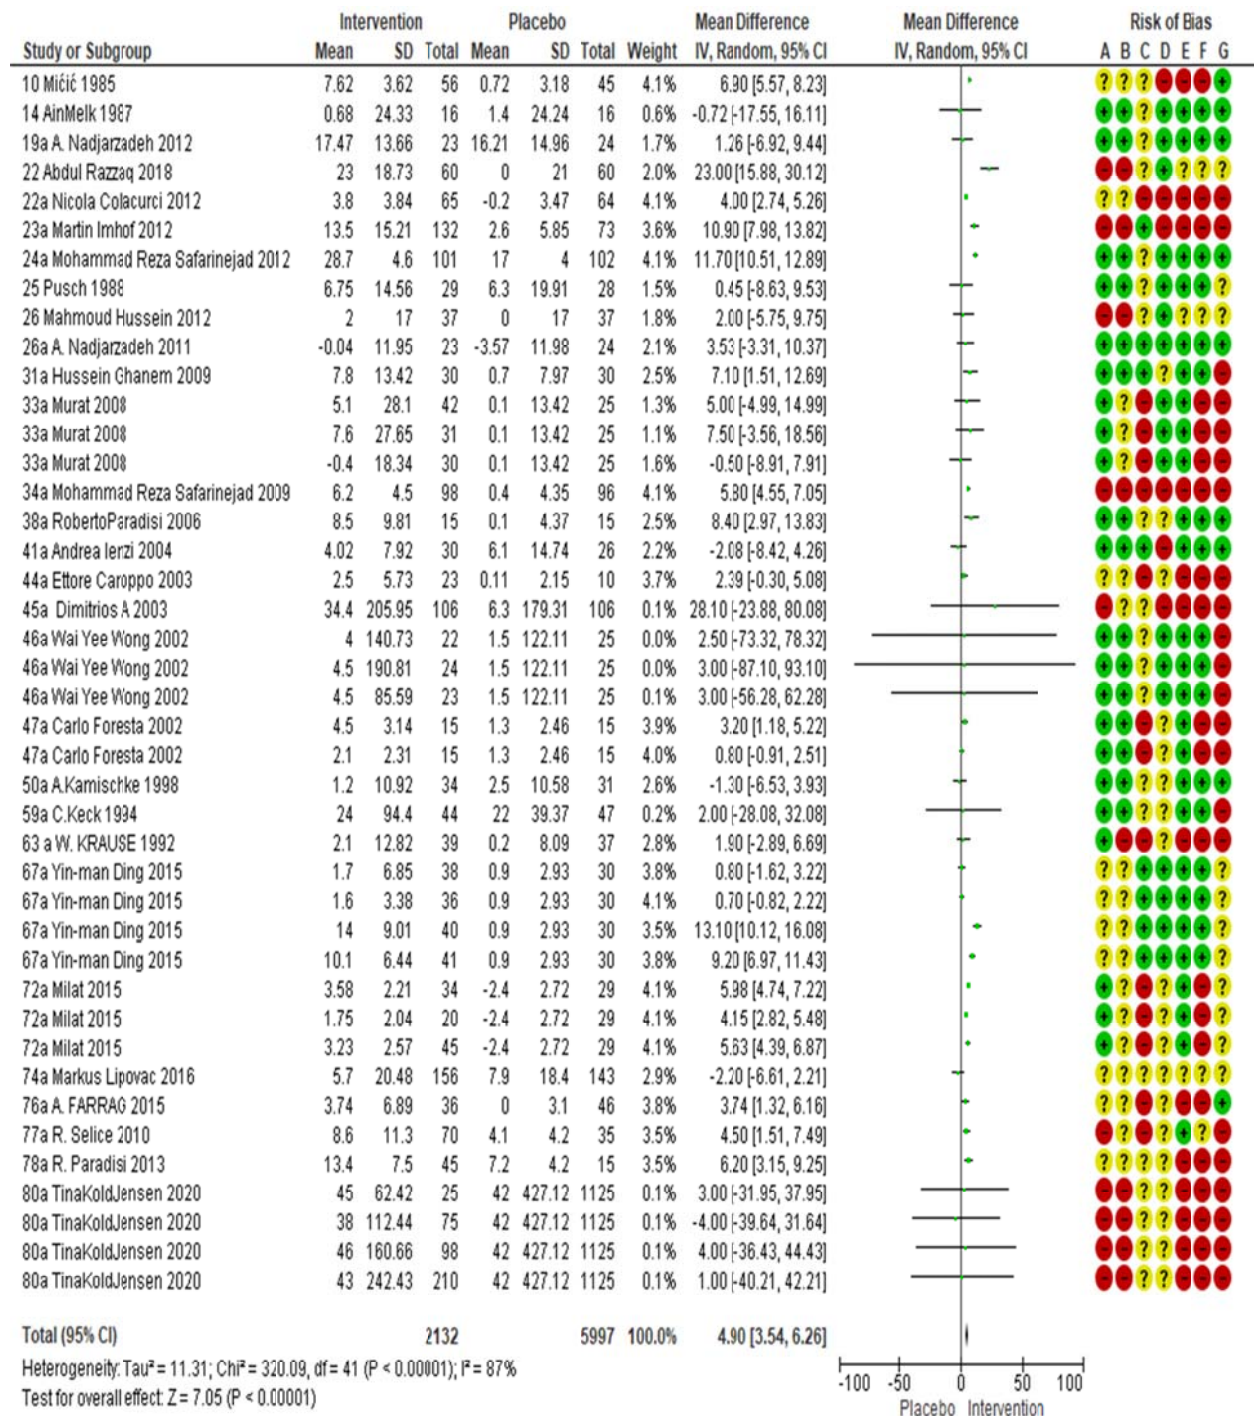

Risk of bias legend

- (A) Random sequence generation (selection bias)
- (B) Allocation concealment (selection bias)
- (C) Selective reporting (reporting bias)
- (D) Other bias
- (E) Blinding of participants and personnel (performance bias)
- (F) Blinding of outcome assessment (detection bias)
- (G) Incomplete outcome data (attrition bias)

**Supplementary Figure 2:** Overall meta-analysis for sperm motility of included RCTs (n=29)

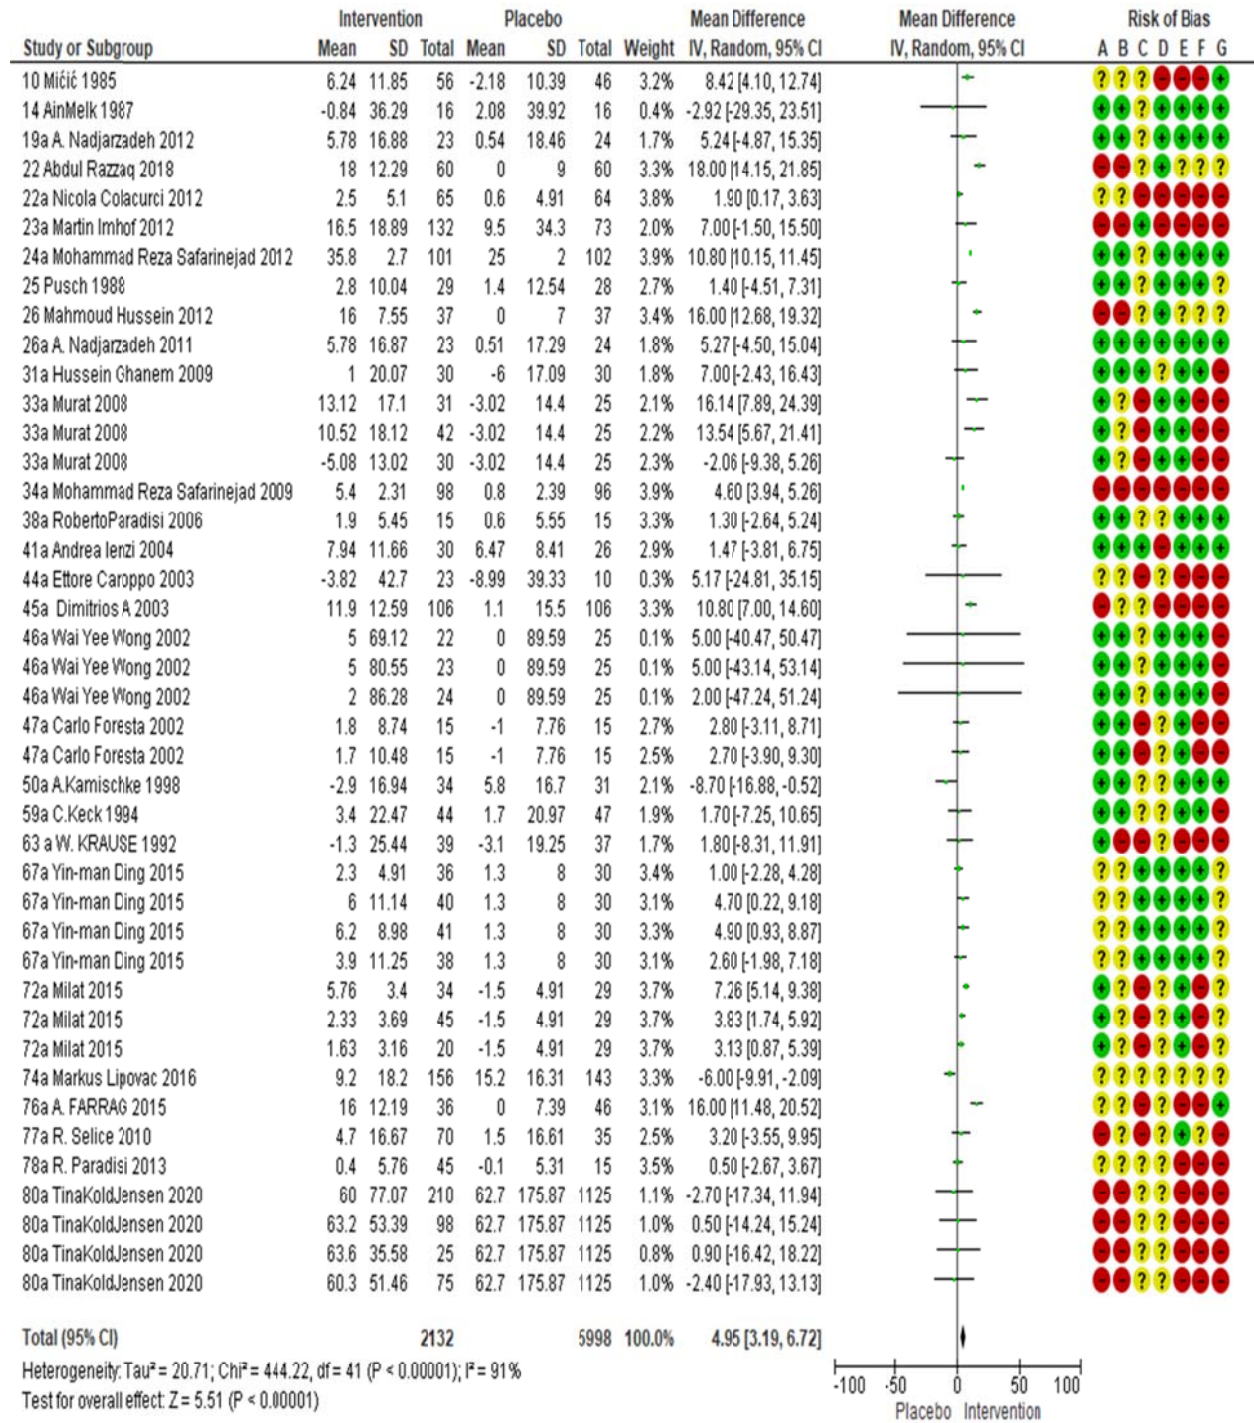

**Risk of bias legend**

- (A) Random sequence generation (selection bias)
- (B) Allocation concealment (selection bias)
- (C) Selective reporting (reporting bias)
- (D) Other bias
- (E) Blinding of participants and personnel (performance bias)
- (F) Blinding of outcome assessment (detection bias)
- (G) Incomplete outcome data (attrition bias)

**Supplementary Figure 3:** Overall meta-analysis for sperm morphology of included RCTs (n=29)

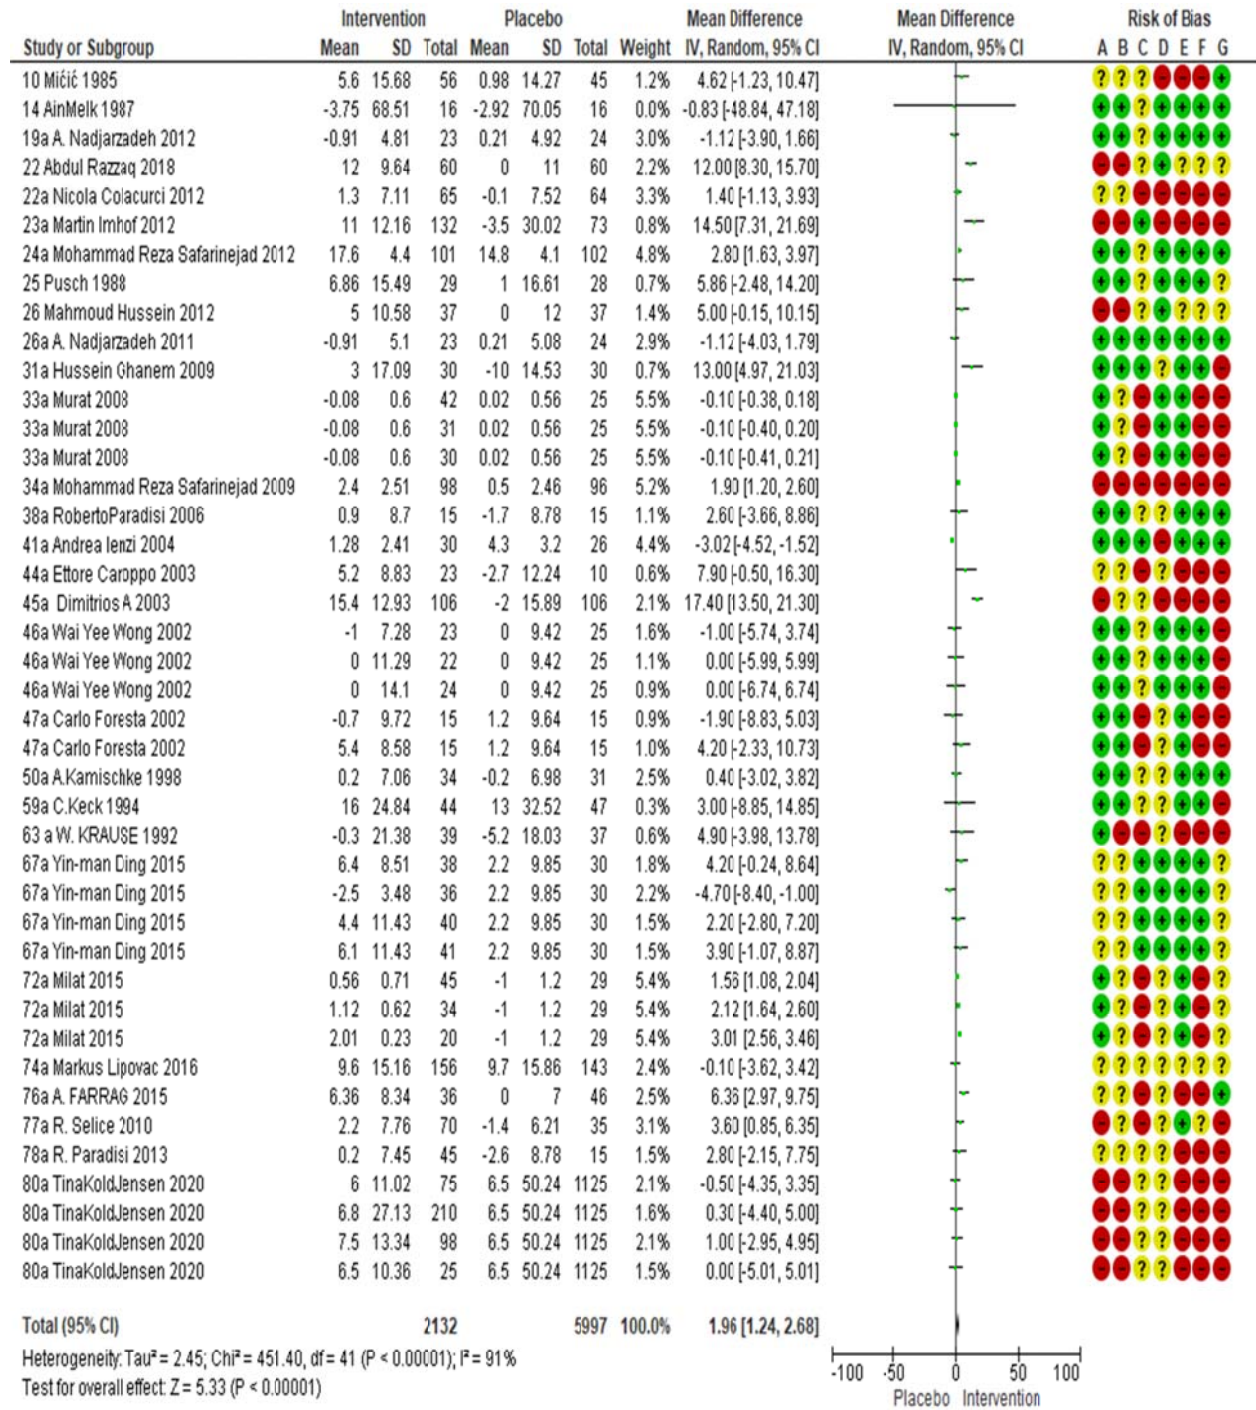

**Risk of bias legend**

- (A) Random sequence generation (selection bias)
- (B) Allocation concealment (selection bias)
- (C) Selective reporting (reporting bias)
- (D) Other bias
- (E) Blinding of participants and personnel (performance bias)
- (F) Blinding of outcome assessment (detection bias)
- (G) Incomplete outcome data (attrition bias)



**Supplementary Figure 4: Sub-group meta-analysis (intervention based) for sperm concentration (n=29)**

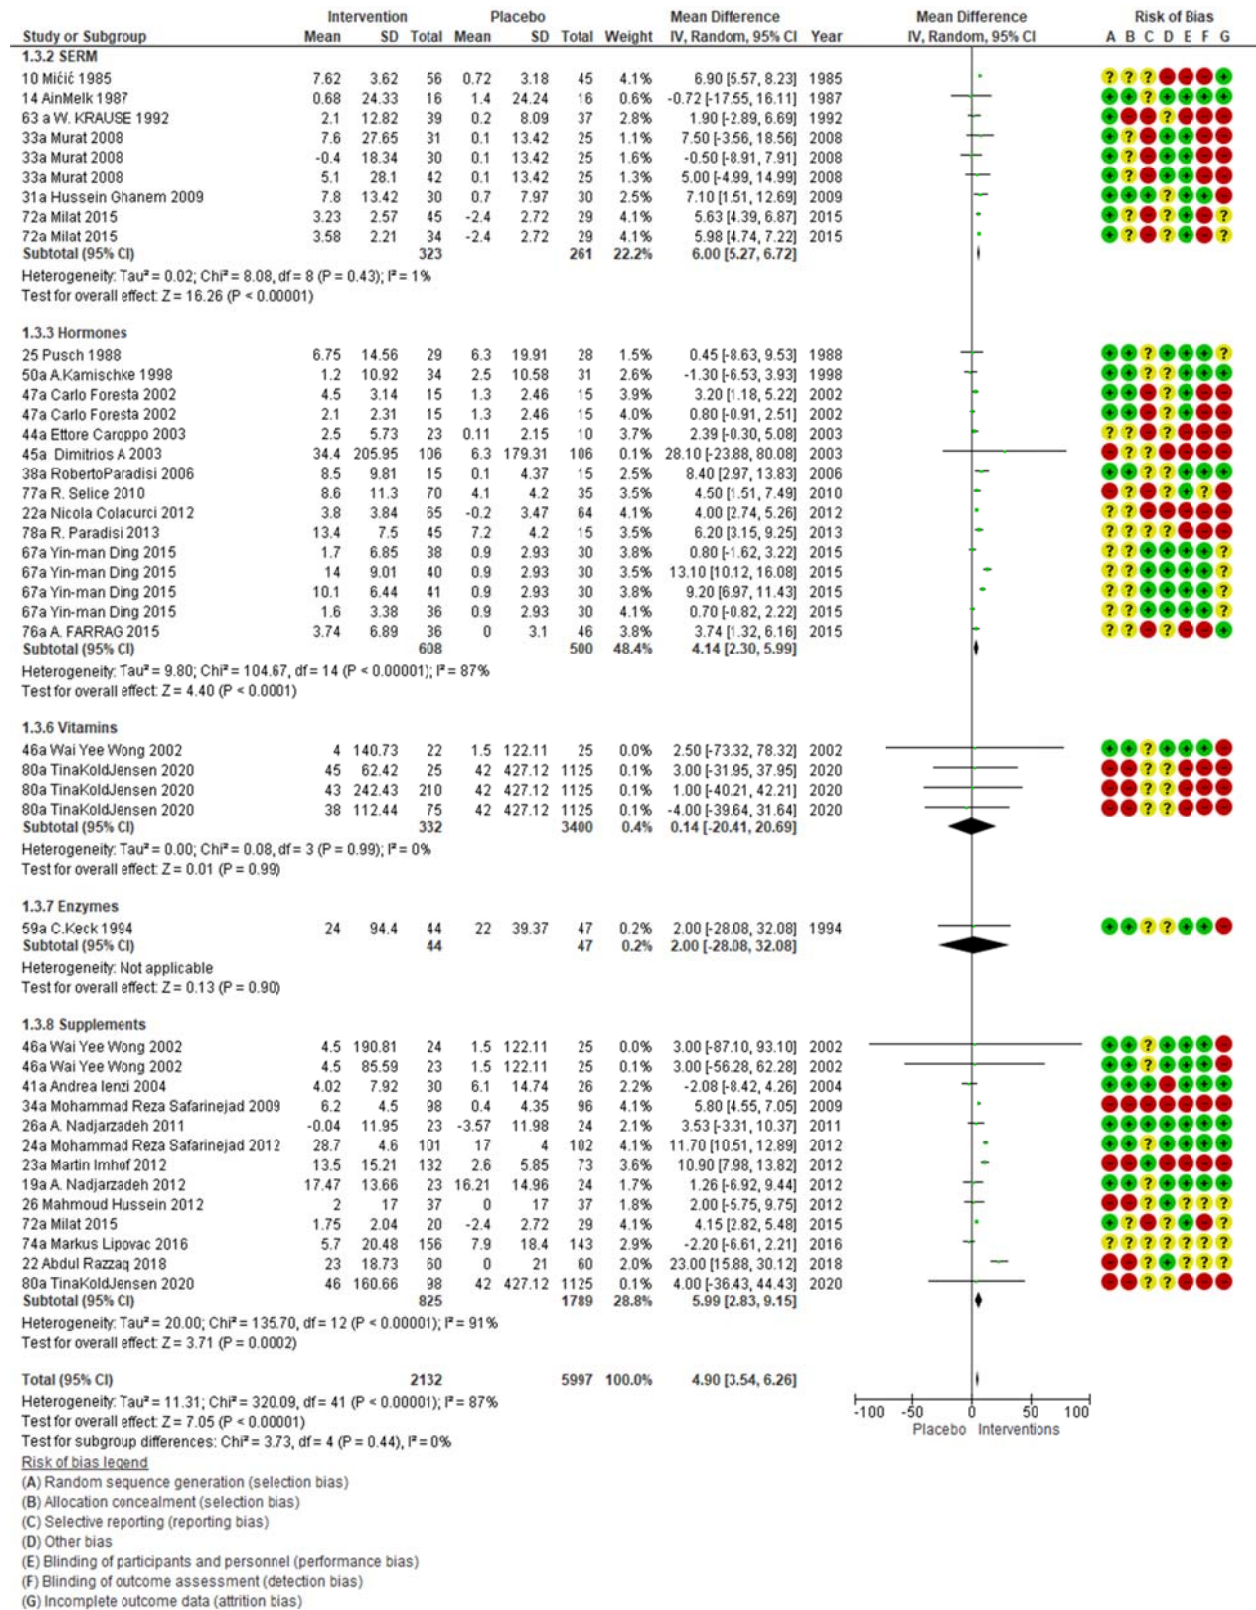

**Supplementary Figure 5:** Sub-group meta-analysis (SERM type based) for sperm concentration (n = 6).

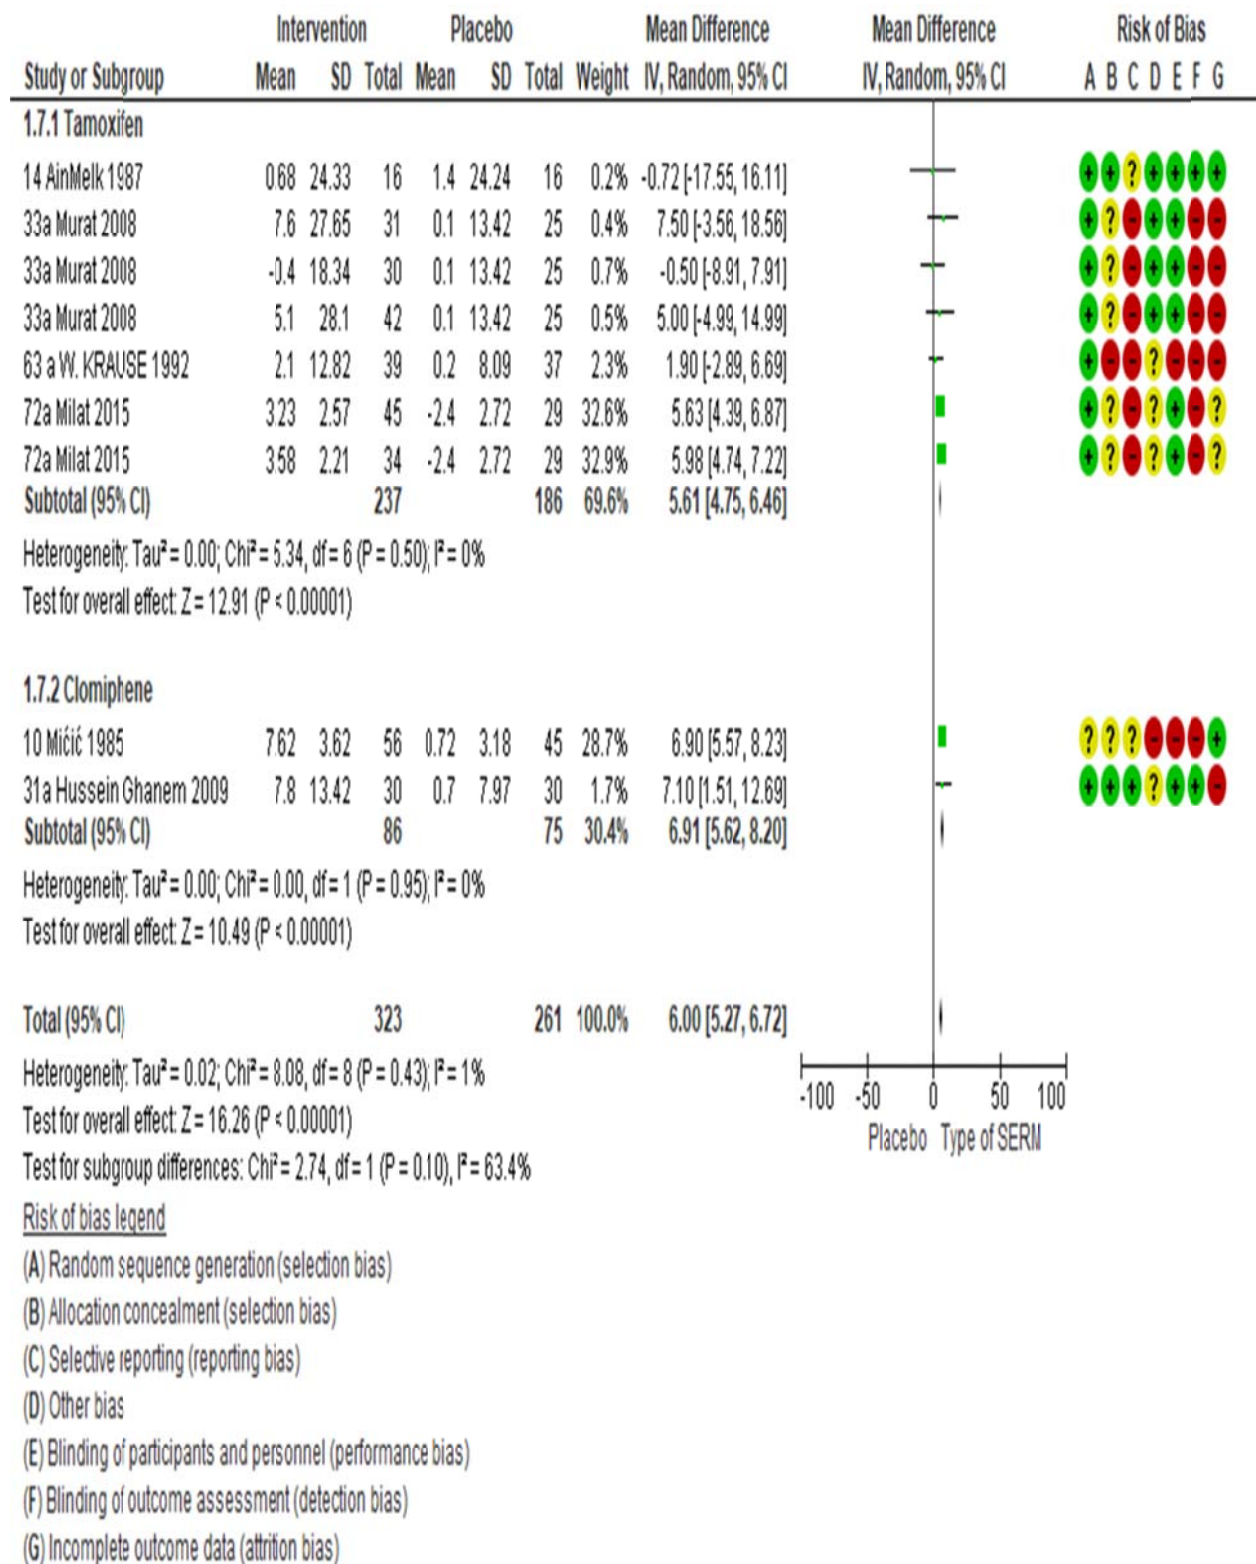

**Supplementary Figure 6:** Sub-group meta-analysis (Supplement type based) for sperm concentration (n = 12)

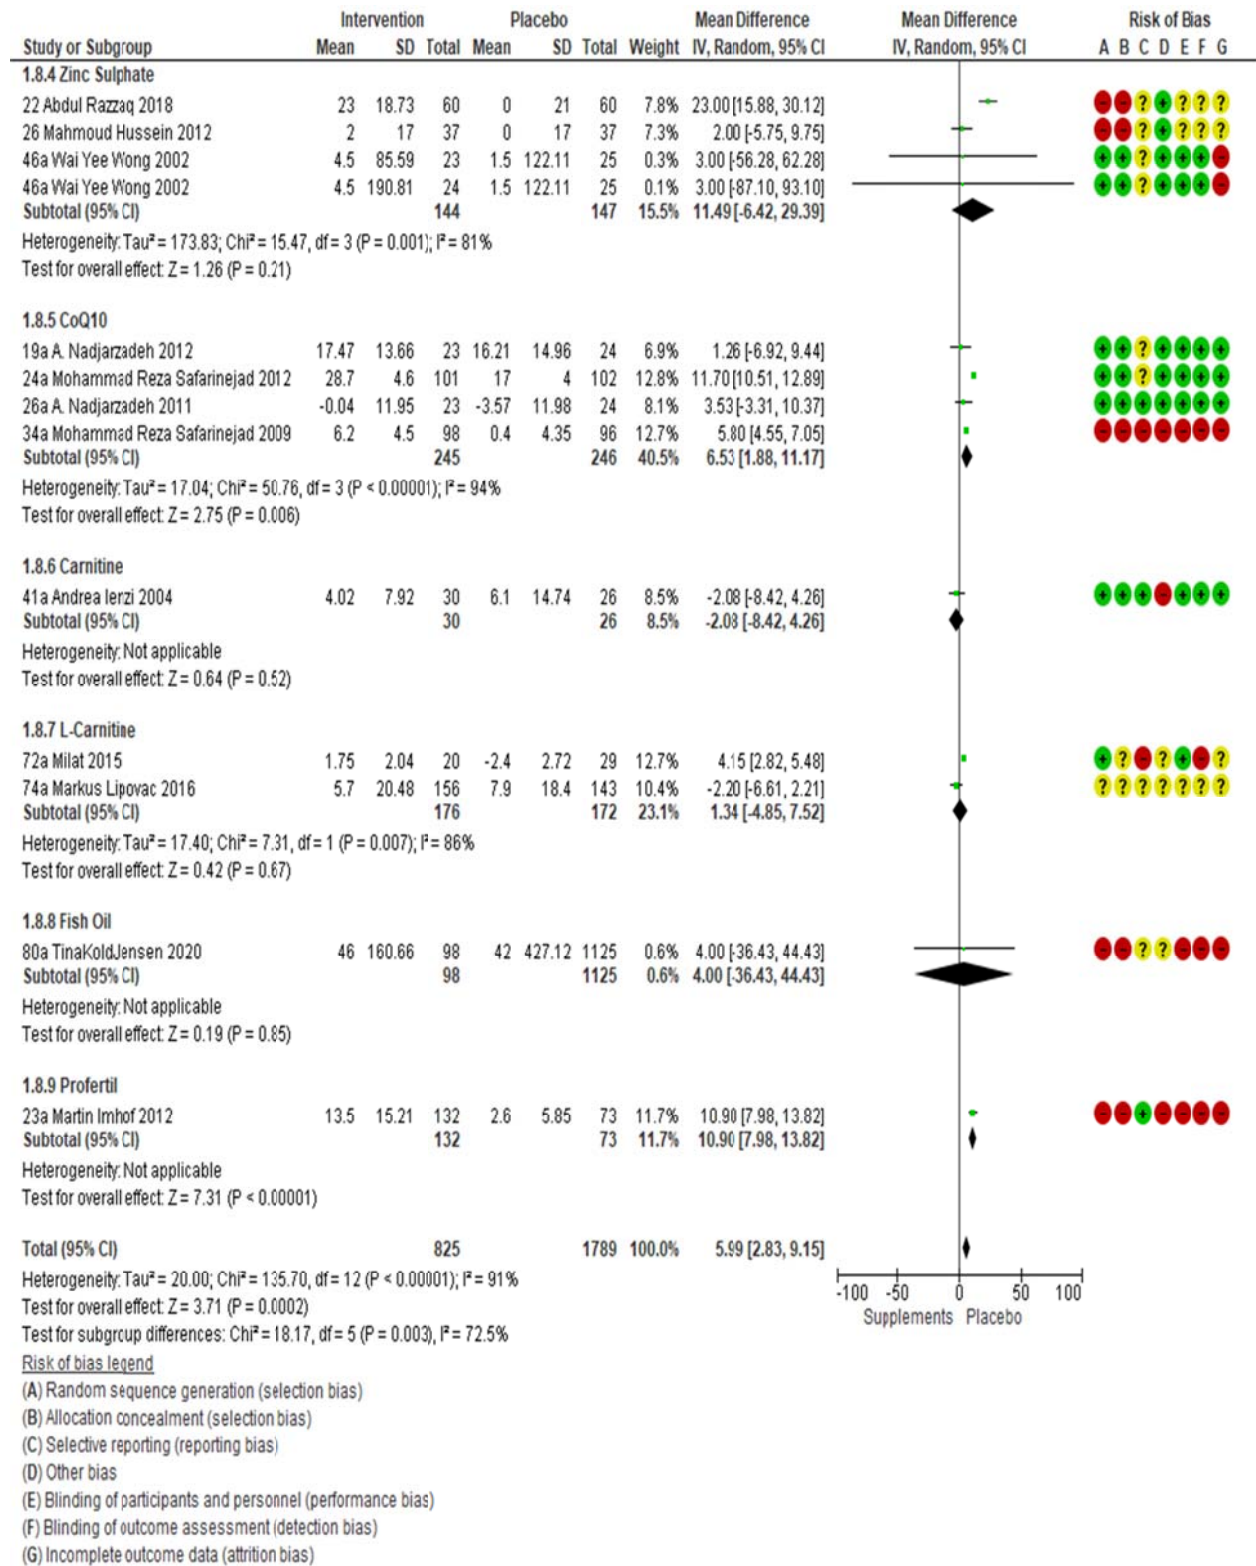

Supplementary Figure 7: Sub-group meta-analysis (intervention based) for sperm motility (n = 29)

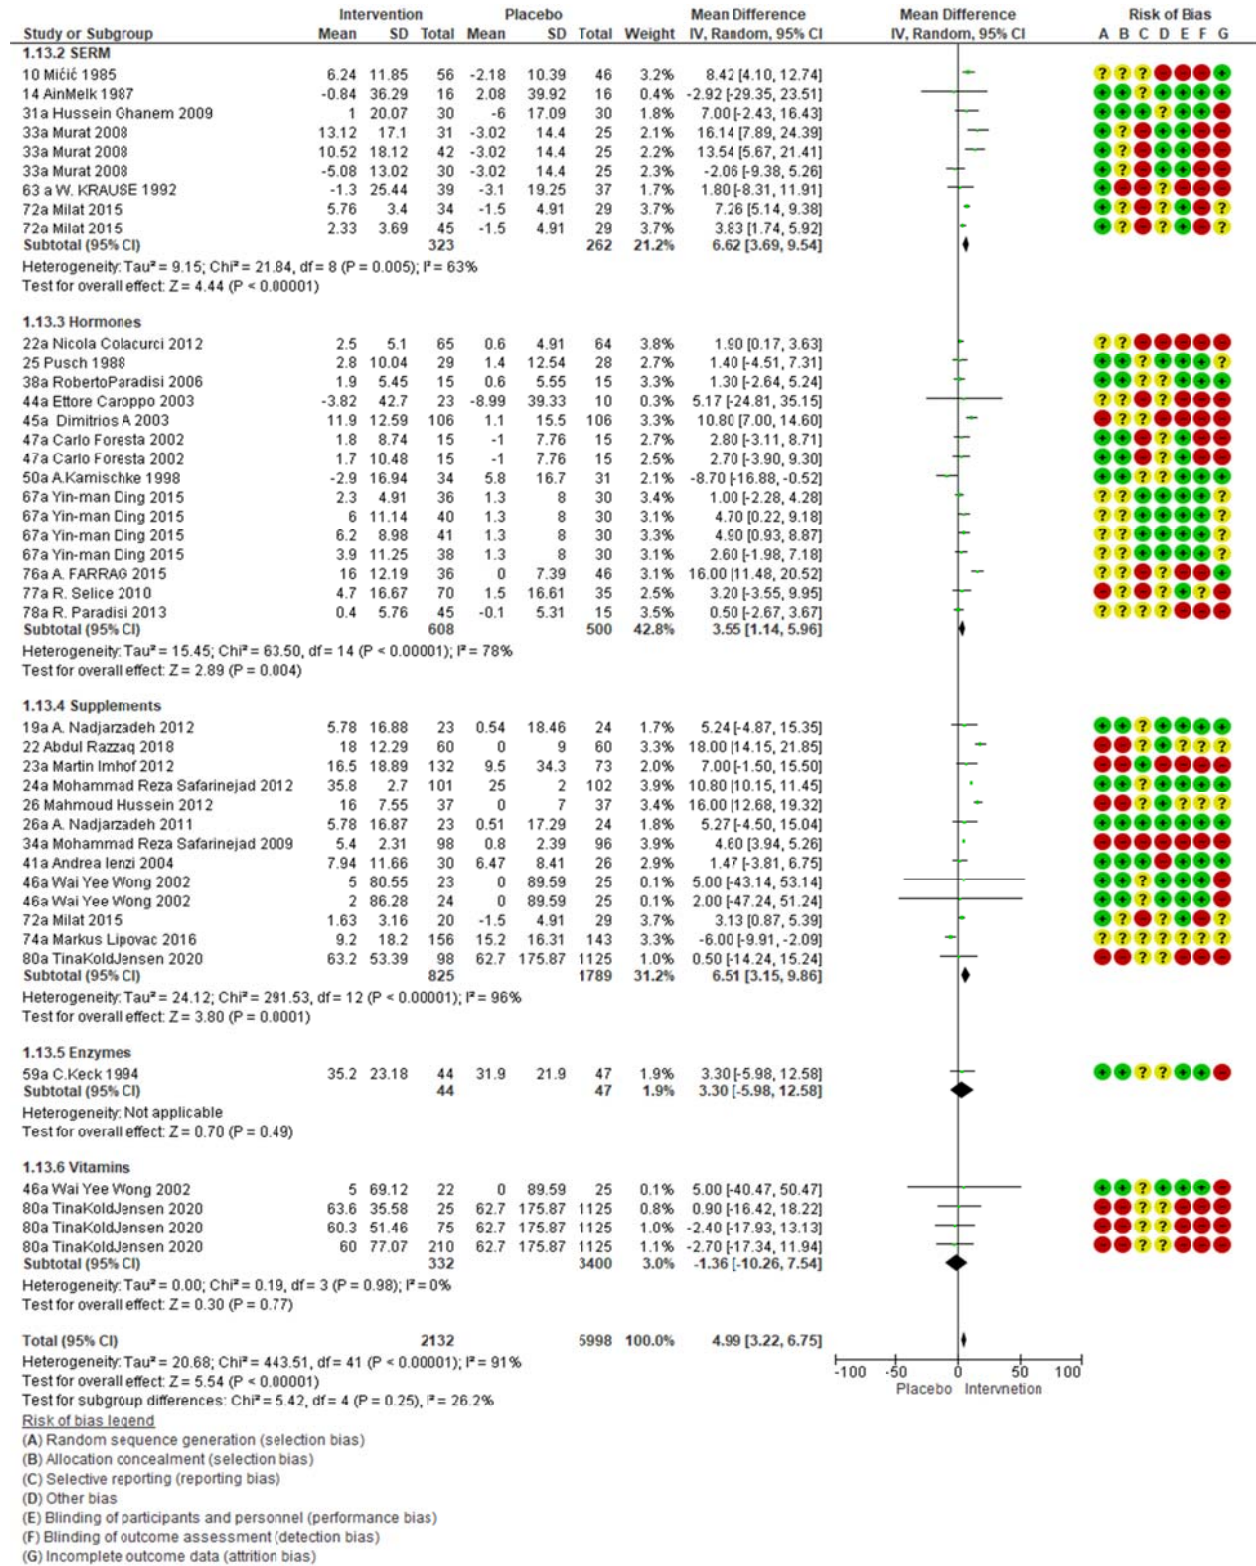

**Supplementary Figure 8:** Sub-group meta-analysis (SERM type based) for sperm motility (n = 6).

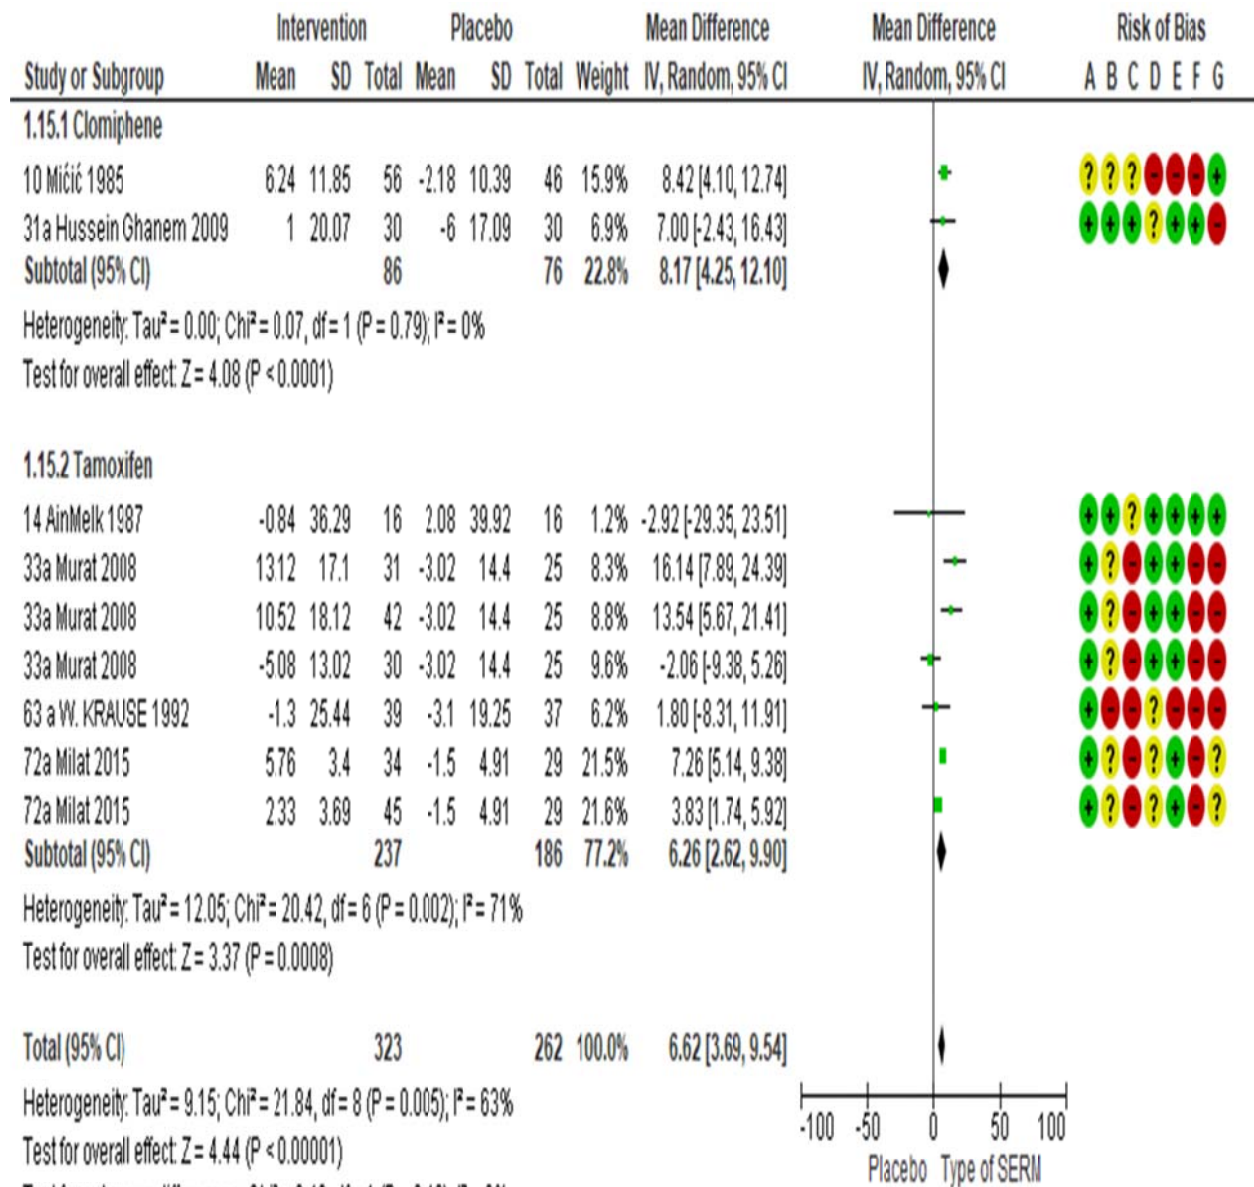

Risk of bias legend

- (A) Random sequence generation (selection bias)
- (B) Allocation concealment (selection bias)
- (C) Selective reporting (reporting bias)
- (D) Other bias
- (E) Blinding of participants and personnel (performance bias)
- (F) Blinding of outcome assessment (detection bias)
- (G) Incomplete outcome data (attrition bias)

**Supplementary Figure 9:** Sub-group meta-analysis (supplement type based) for sperm motility (n = 12).

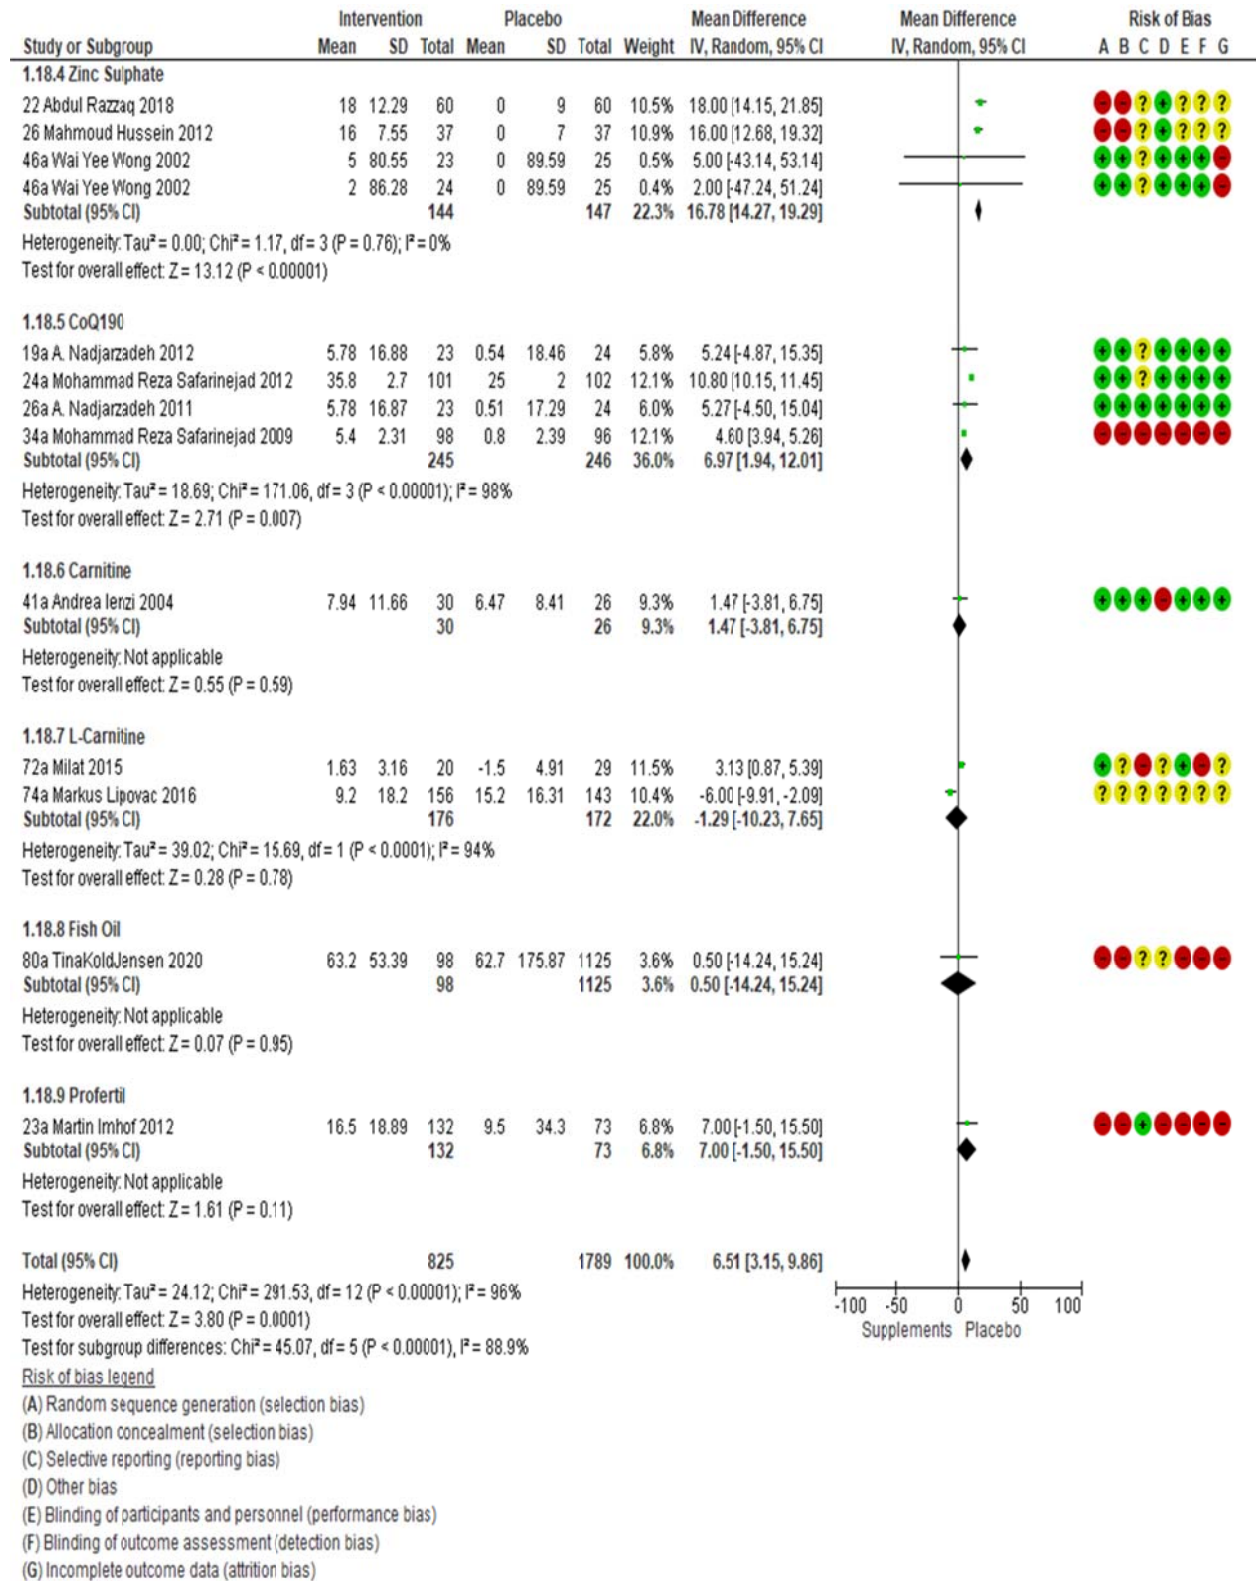

**Supplementary Figure 10: Sub-group meta-analysis (intervention based) for sperm morphology (n=29).**

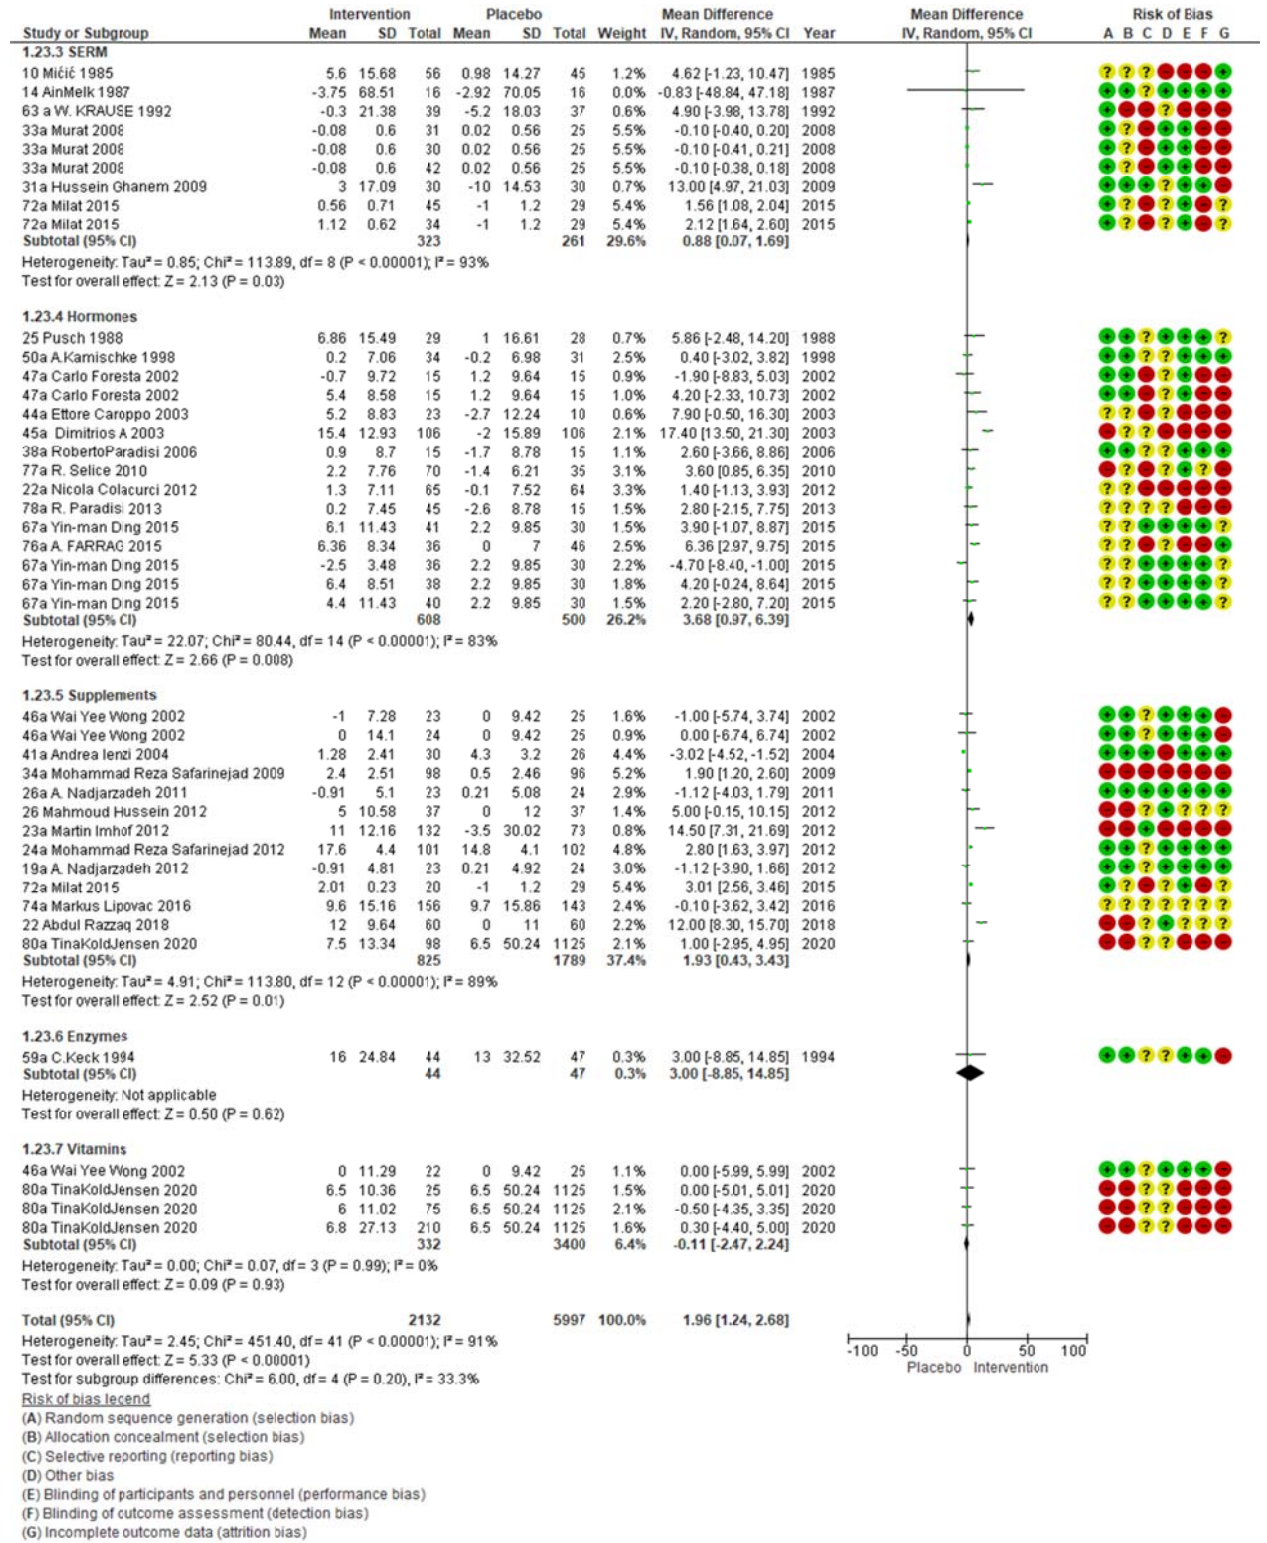

**Supplementary Figure 11: Sub-group meta-analysis (hormone type based) for sperm morphology (n = 12)**

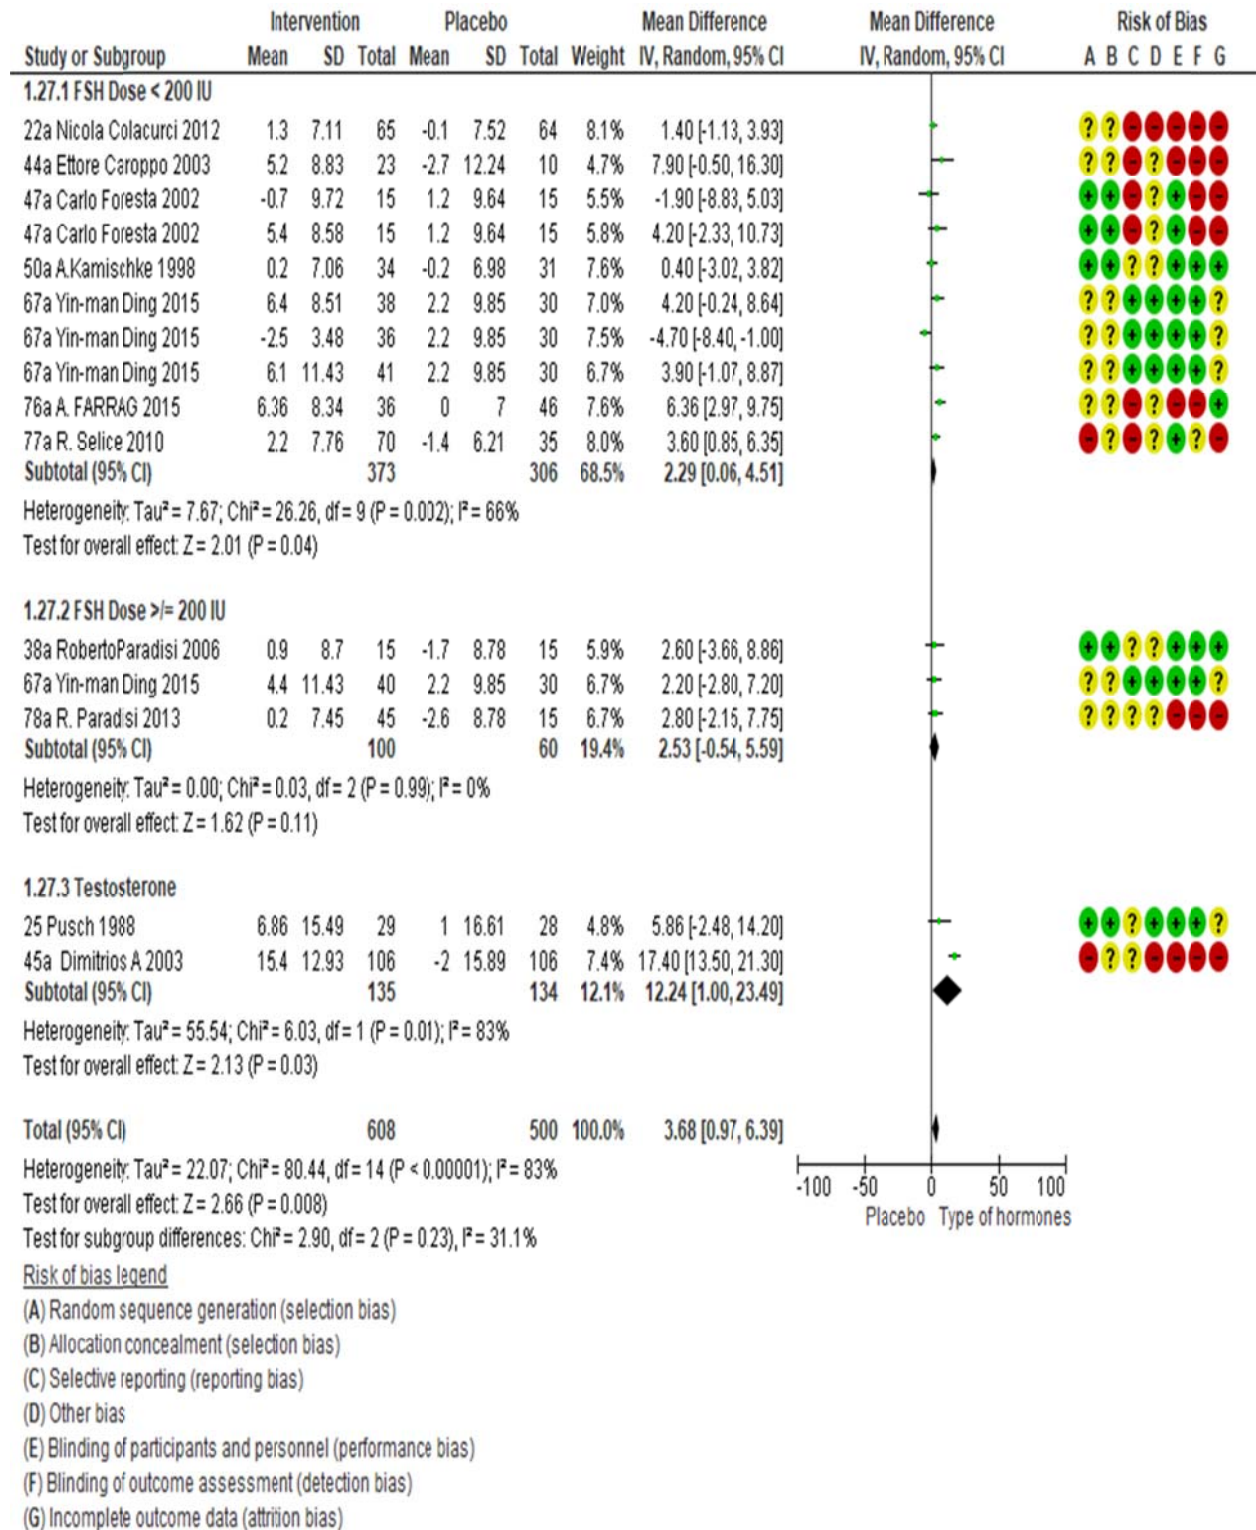



**Supplementary Figure 12: Sub-group meta-analysis (supplement type based) for sperm morphology (n=12)**

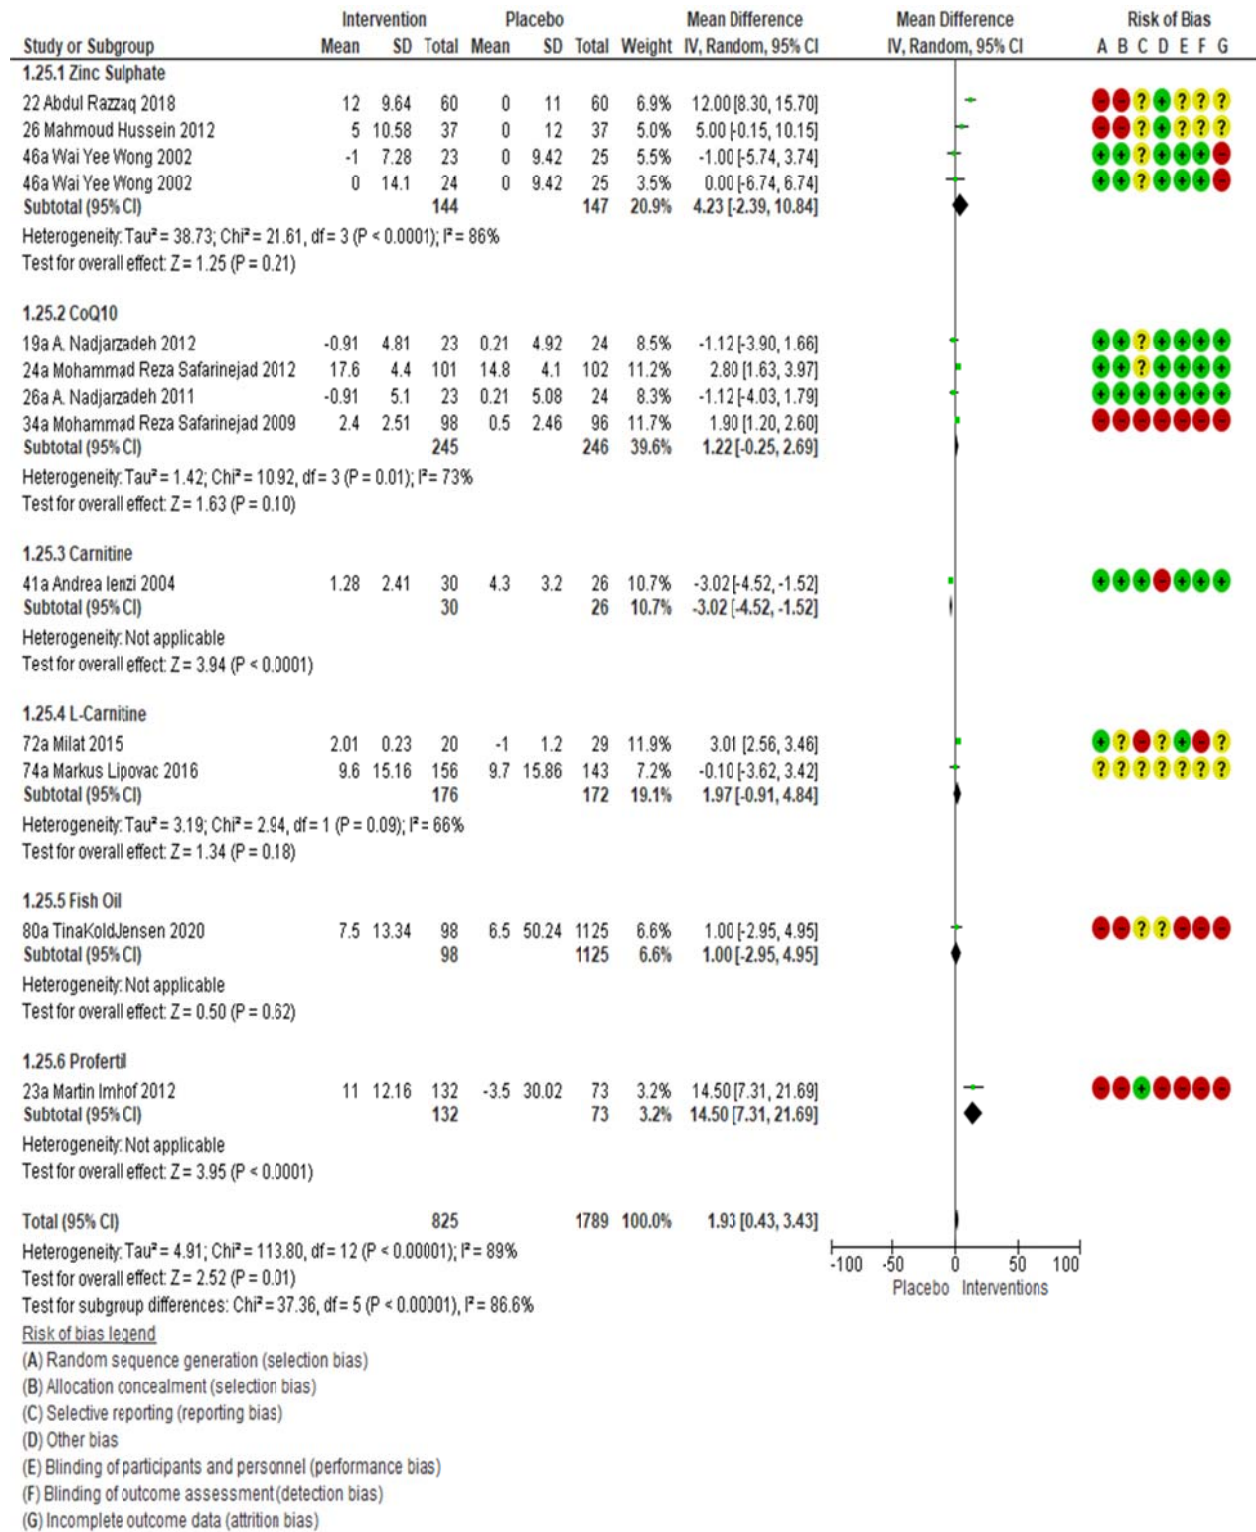

**Supplementary Figure 13:** Overall meta-analysis for total serum testosterone of included RCTs (n=17).

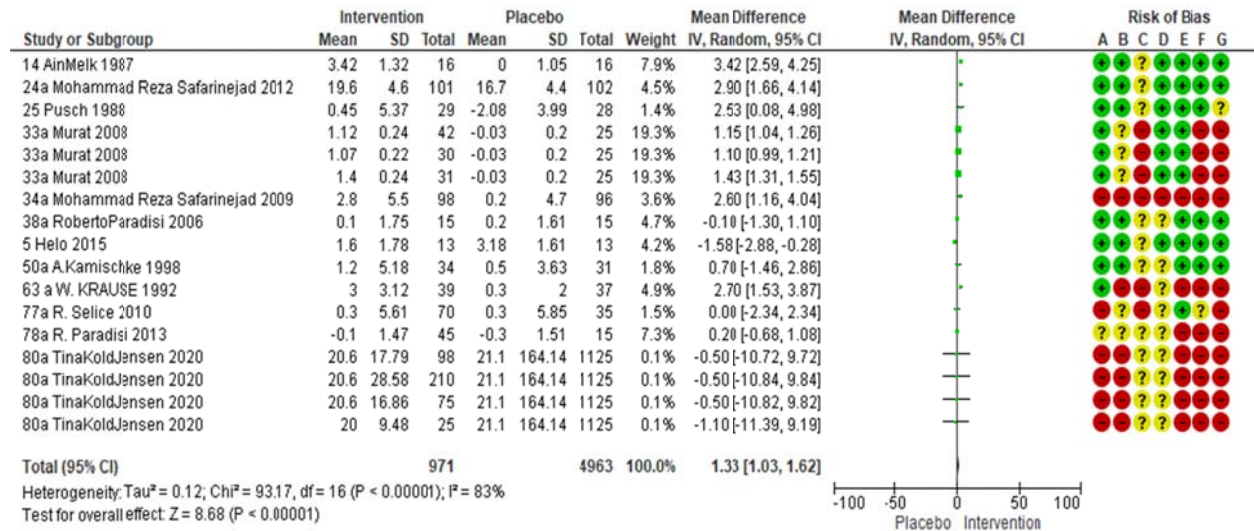

Risk of bias legend

- (A) Random sequence generation (selection bias)
- (B) Allocation concealment (selection bias)
- (C) Selective reporting (reporting bias)
- (D) Other bias
- (E) Blinding of participants and personnel (performance bias)
- (F) Blinding of outcome assessment (detection bias)
- (G) Incomplete outcome data (attrition bias)

**Supplementary Figure 14:** Overall meta-analysis for total serum FSH of included RCTs (n=17).

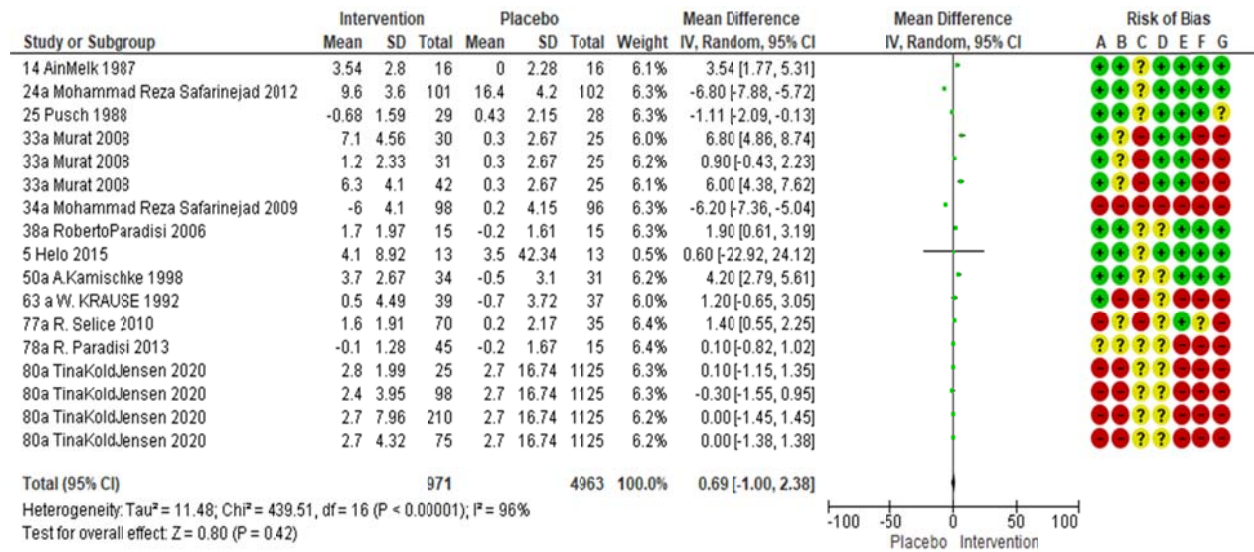

Risk of bias legend

- (A) Random sequence generation (selection bias)
- (B) Allocation concealment (selection bias)
- (C) Selective reporting (reporting bias)
- (D) Other bias
- (E) Blinding of participants and personnel (performance bias)
- (F) Blinding of outcome assessment (detection bias)
- (G) Incomplete outcome data (attrition bias)

**Supplementary Figure 15:** Sub-group meta-analysis (intervention based) for total serum testosterone (n = 12).

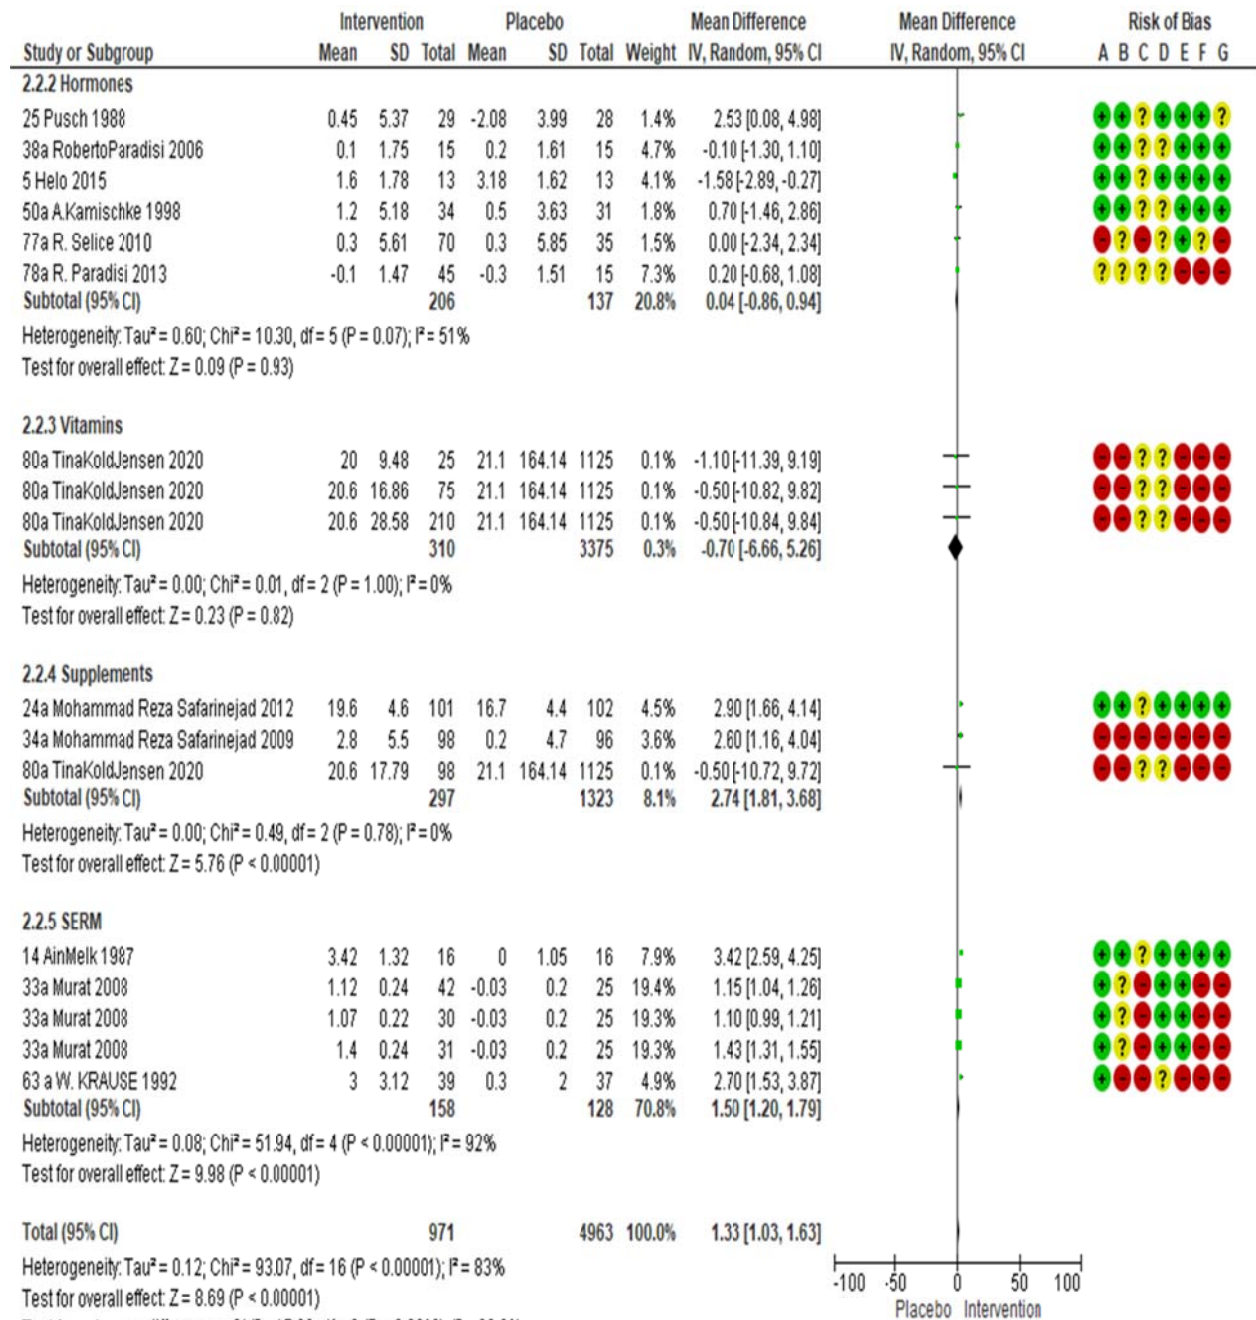

**Risk of bias legend**

- (A) Random sequence generation (selection bias)
- (B) Allocation concealment (selection bias)
- (C) Selective reporting (reporting bias)
- (D) Other bias
- (E) Blinding of participants and personnel (performance bias)
- (F) Blinding of outcome assessment (detection bias)
- (G) Incomplete outcome data (attrition bias)







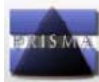

# PRISMA 2009 Checklist

| Section/topic                      | #  | Checklist item                                                                                                                                                                                                                                                                                              | Reported on page # |
|------------------------------------|----|-------------------------------------------------------------------------------------------------------------------------------------------------------------------------------------------------------------------------------------------------------------------------------------------------------------|--------------------|
| <b>TITLE</b>                       |    |                                                                                                                                                                                                                                                                                                             | <b>01</b>          |
| Title                              | 1  | Identify the report as a systematic review, meta-analysis, or both.                                                                                                                                                                                                                                         | 01                 |
| <b>ABSTRACT</b>                    |    |                                                                                                                                                                                                                                                                                                             | <b>03-04</b>       |
| Structured summary                 | 2  | Provide a structured summary including, as applicable: background; objectives; data sources; study eligibility criteria, participants, and interventions; study appraisal and synthesis methods; results; limitations; conclusions and implications of key findings; systematic review registration number. | 03-04              |
| <b>INTRODUCTION</b>                |    |                                                                                                                                                                                                                                                                                                             | <b>03-06</b>       |
| Rationale                          | 3  | Describe the rationale for the review in the context of what is already known.                                                                                                                                                                                                                              | 03-05              |
| Objectives                         | 4  | Provide an explicit statement of questions being addressed with reference to participants, interventions, comparisons, outcomes, and study design (PICOS).                                                                                                                                                  | 06                 |
| <b>METHODS</b>                     |    |                                                                                                                                                                                                                                                                                                             | <b>06-08</b>       |
| Protocol and registration          | 5  | Indicate if a review protocol exists, if and where it can be accessed (e.g., Web address), and, if available, provide registration information including registration number.                                                                                                                               | 08                 |
| Eligibility criteria               | 6  | Specify study characteristics (e.g., PICOS, length of follow-up) and report characteristics (e.g., years considered, language, publication status) used as criteria for eligibility, giving rationale.                                                                                                      | 07                 |
| Information sources                | 7  | Describe all information sources (e.g., databases with dates of coverage, contact with study authors to identify additional studies) in the search and date last searched.                                                                                                                                  | 06                 |
| Search                             | 8  | Present full electronic search strategy for at least one database, including any limits used, such that it could be repeated.                                                                                                                                                                               | 06                 |
| Study selection                    | 9  | State the process for selecting studies (i.e., screening, eligibility, included in systematic review, and, if applicable, included in the meta-analysis).                                                                                                                                                   | 07                 |
| Data collection process            | 10 | Describe method of data extraction from reports (e.g., piloted forms, independently, in duplicate) and any processes for obtaining and confirming data from investigators.                                                                                                                                  | 07                 |
| Data items                         | 11 | List and define all variables for which data were sought (e.g., PICOS, funding sources) and any assumptions and simplifications made.                                                                                                                                                                       | 07                 |
| Risk of bias in individual studies | 12 | Describe methods used for assessing risk of bias of individual studies (including specification of whether this was done at the study or outcome level), and how this information is to be used in any data synthesis.                                                                                      | 07                 |
| Summary measures                   | 13 | State the principal summary measures (e.g., risk ratio, difference in means).                                                                                                                                                                                                                               | 07                 |
| Synthesis of results               | 14 | Describe the methods of handling data and combining results of studies, if done, including measures of consistency (e.g., $I^2$ ) for each meta-analysis.                                                                                                                                                   | 07                 |

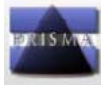

# PRISMA 2009 Checklist

| Section/topic                 | #  | Checklist item                                                                                                                                                                                           | Reported on page # |
|-------------------------------|----|----------------------------------------------------------------------------------------------------------------------------------------------------------------------------------------------------------|--------------------|
| Risk of bias across studies   | 15 | Specify any assessment of risk of bias that may affect the cumulative evidence (e.g., publication bias, selective reporting within studies).                                                             | 07                 |
| Additional analyses           | 16 | Describe methods of additional analyses (e.g., sensitivity or subgroup analyses, meta-regression), if done, indicating which were pre-specified.                                                         | 07                 |
| <b>RESULTS</b>                |    |                                                                                                                                                                                                          | <b>08-15</b>       |
| Study selection               | 17 | Give numbers of studies screened, assessed for eligibility, and included in the review, with reasons for exclusions at each stage, ideally with a flow diagram.                                          | 08                 |
| Study characteristics         | 18 | For each study, present characteristics for which data were extracted (e.g., study size, PICOS, follow-up period) and provide the citations.                                                             | 08                 |
| Risk of bias within studies   | 19 | Present data on risk of bias of each study and, if available, any outcome level assessment (see item 12).                                                                                                | 09                 |
| Results of individual studies | 20 | For all outcomes considered (benefits or harms), present, for each study: (a) simple summary data for each intervention group (b) effect estimates and confidence intervals, ideally with a forest plot. | 09                 |
| Synthesis of results          | 21 | Present results of each meta-analysis done, including confidence intervals and measures of consistency.                                                                                                  | 09-13              |
| Risk of bias across studies   | 22 | Present results of any assessment of risk of bias across studies (see Item 15).                                                                                                                          | 09                 |
| Additional analysis           | 23 | Give results of additional analyses, if done (e.g., sensitivity or subgroup analyses, meta-regression [see Item 16]).                                                                                    | 09-13              |
| <b>DISCUSSION</b>             |    |                                                                                                                                                                                                          | <b>15-18</b>       |
| Summary of evidence           | 24 | Summarize the main findings including the strength of evidence for each main outcome; consider their relevance to key groups (e.g., healthcare providers, users, and policy makers).                     | 15-17              |
| Limitations                   | 25 | Discuss limitations at study and outcome level (e.g., risk of bias), and at review-level (e.g., incomplete retrieval of identified research, reporting bias).                                            | 17                 |
| Conclusions                   | 26 | Provide a general interpretation of the results in the context of other evidence, and implications for future research.                                                                                  | 17-18              |
| <b>FUNDING</b>                |    |                                                                                                                                                                                                          | <b>18</b>          |
| Funding                       | 27 | Describe sources of funding for the systematic review and other support (e.g., supply of data); role of funders for the systematic review.                                                               | 18                 |

From: Moher D, Liberati A, Tetzlaff J, Altman DG, The PRISMA Group (2009). Preferred Reporting Items for Systematic Reviews and Meta-Analyses: The PRISMA Statement. PLoS Med 6(7): e1000097. doi:10.1371/journal.pmed1000097

For more information, visit: [www.prisma-statement.org](http://www.prisma-statement.org).
